# Supplementary material
Source: HighWire-hosted journal article supplement (https://gut.bmj.com/content/70/7/1241)
Supplement: inline-supplementary-material-1 [file inline-supplementary-material-1.pdf]

**Table S1.** Number of elective endoscopic procedures performed during P1 (week 11-18/2019) and P2 (week 11-18/2020).

| Type of procedures |                 |                | Number of procedures<br>(median procedures per centre; IQR) |                         |          |
|--------------------|-----------------|----------------|-------------------------------------------------------------|-------------------------|----------|
|                    |                 |                | 2019 (P1)                                                   | 2020 (P2)               | Decrease |
| Upper endoscopy    | diagnostic      |                | 4,439<br>(555; 368-777)                                     | 1,219<br>(130; 93-206)  | -72.5%   |
|                    | therapeutic     | PEG            | 121                                                         | 58                      | -52.1%   |
|                    |                 | VBL            | 134                                                         | 69                      | -48.5%   |
|                    |                 | Dilation/Stent | 74                                                          | 23                      | -68.9%   |
|                    |                 | Myotomy        | 42<br>(33;20 -65)                                           | 19<br>(11; 7-26)        | -54.8%   |
|                    |                 | <i>total</i>   | 4,848<br>(607; 398-840)                                     | 1,399<br>(138; 116-233) | -71.1%   |
| Lower endoscopy    | diagnostic      |                | 4,302<br>(464; 356-765)                                     | 1,003<br>(105; 91-130)  | -76.7%   |
|                    | therapeutic     | Polypectomy    | 1,652                                                       | 329                     | -80.1%   |
|                    |                 | EMR            | 339                                                         | 63                      | -81.4%   |
|                    |                 | ESD            | 34<br>(185; 95-318)                                         | 18<br>(35;13-83)        | -47.1%   |
|                    |                 | <i>total</i>   | 6,379<br>(682; 465-1179)                                    | 1,405<br>(153; 103-221) | -77.9%   |
| Enteroscopy        | diagnostic      |                | 63                                                          | 3                       | -95.2%   |
|                    | therapeutic     |                | 20                                                          | 3                       | -85%     |
| Videocapsule       |                 |                | 153                                                         | 30                      | -80.4%   |
|                    |                 | <i>total</i>   | 236<br>(26.5; 10-45)                                        | 35<br>(3; 1-9)          | -85.2%   |
| ERCP               | benign etiology |                | 299                                                         | 143                     | -52.2%   |
|                    |                 | malignancy     | 104                                                         | 85                      | -18.3%   |
|                    |                 | <i>total</i>   | 4033<br>(36; 10-73)                                         | 228<br>(13; 3-37)       | -43.4%   |
| EUS                | diagnostic      |                | 513                                                         | 265                     | -48.3%   |
|                    | interventional  |                | 253                                                         | 142                     | -43.9%   |
|                    |                 | <i>total</i>   | 766<br>(60; 13-131 )                                        | 407<br>(14; 1-49)       | -46.9%   |

Legend: PEG percutaneous endoscopic gastrostomy, VBL variceal band ligation, EMR endoscopic mucosal resection, ESD endoscopic submucosal resection, ERCP Endoscopic retrograde cholangio-pancreatography, EUS endoscopic ultrasound.
